# Supplementary material
Source: MDPI journal article supplement (https://www.mdpi.com/2075-4701/10/12/1649)
Supplement: s1 [file s1]

Sample of initial length  $(L_0)_z = 30.3 \text{ nm}$ .

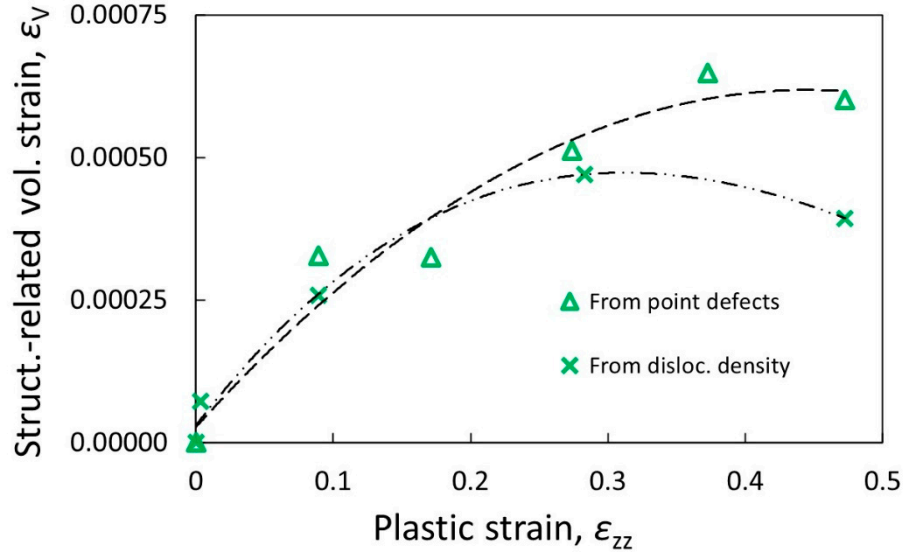

**Figure S1.** Contribution of point defects and dislocation density to volume deformation as a function of plastic elongation.

Contribution to volume deformation  $\epsilon_v$

**Table S1. DISLOCATIONS.** Data from measurements of dislocation density  $\rho$  inside the grains.

| $\epsilon$ | $\rho$ ( $10^{16} \text{ m}^{-2}$ ) | $10^4 \cdot (\epsilon_v)_{pl}$ |
|------------|-------------------------------------|--------------------------------|
| 0          | 0                                   | 0                              |
| 0.049      | 0.23                                | 0.726                          |
| 0.12       | 0.83                                | 2.59                           |
| 0.31       | 1.51                                | 4.71                           |
| 0.5        | 1.26                                | 3.94                           |

Dislocation density inside the grains as a function of total strain  $\epsilon$  calculated from quantitative stereology method (length per unit volume calculated from line intersection method on axial projections, volume corrected for GB volume).

**Table S2. POINT DEFECTS.** Data from measurements of point defects density  $N_V$  inside the grains.

| $\epsilon$ | $N_V$ ( $\text{nm}^{-3}$ ) | $10^4 \cdot (\epsilon_v)_{pl}$ |
|------------|----------------------------|--------------------------------|
| 0          | 0                          | 0                              |
| 0.12       | 0.0209                     | 3.3                            |
| 0.2        | 0.0208                     | 3.2                            |
| 0.3        | 0.0328                     | 5.1                            |
| 0.4        | 0.0415                     | 6.5                            |
| 0.5        | 0.0384                     | 6.0                            |

Point defect density per unit volume as a function of total strain  $\epsilon$  calculated from point counting method on axial projections of sections 10 nm thick, effective thickness assumed as  $(10 \text{ nm} + 3 \cdot r_d)$ ; excess volume per defect assumed  $b^3$  and radius of defect  $r_d = 0.6035 \text{ nm}$ .
